# Supplementary material
Source: publisher figshare collection journal article supplement (https://future-science-group.figshare.com/ndownloader/files/31420579)
Supplement: Supplementary file 1 [file 31420579]

**Supplement Table 1: Treatment preferences of all patients based on 4-item Likert scale**

| **Statements** | **Strongly disagree (%)** | **Disagree (%)** | **Agree (%)** | **Strongly agree (%)** |
| --- | --- | --- | --- | --- |
| Living longer is important to me even if treatment will result in side effects such as life-threatening infection. | 4 | 39 | 44 | 12 |
| Living longer is important to me even if treatment will result in poor quality of life. | 19 | 48 | 26 | 5 |
| I would accept a treatment that is very effective but results in a financial burden including debt. | 10 | 29 | 47 | 12 |
| I would travel long distance (for example, 2 hours or more) multiple times during treatment to receive care from cancer experts. | 3 | 6 | 52 | 38 |
| I would undergo a more effective treatment even if the treatment causes significant pain (for example, mouth sores, or stomach cramps). | 3 | 16 | 52 | 28 |
| I would undergo treatment that maintains or improves my quality of life but does not help me live longer. | 6 | 17 | 64 | 11 |
| I would rather live a shorter life than permanently lose my ability to think, remember things and make decisions | 6 | 17 | 52 | 24 |
| I would rather live a shorter life than permanently lose my ability to do daily activities such as grooming, eating, or self-care. | 6 | 22 | 49 | 22 |
